# Supplementary material
Source: PubMed Central journal article supplement (PMC3386529)

## Supplemental Data

**Figure S1. PR recruitment to the promoter and enhancer of  $\beta$ -casein is specifically induced by progestins.** HC-11 cells were transduced with 50 pfu/cell of hPR-B encoding adenovirus and were treated for 30 minutes with: EtOH (- control), R5020 (100nM), hydrocortisone (1 $\mu$ g/mL), R5020 (100nM) + hydrocortisone (1 $\mu$ g/mL), hydrocortisone (1 $\mu$ g/mL) + ovine PRL (3 $\mu$ g/mL), or R5020 (100nM) + hydrocortisone (1 $\mu$ g/mL) + ovine PRL (3 $\mu$ g/mL). Cells were harvested and processed for ChIP assay of PR and data were quantified as average density of immunoprecipitated DNA as a percentage of total input DNA on the agarose gels after subtracting signals obtained with control antibody. The values are averages  $\pm$  SEM from 3 independent ChIP assays. **Insets** are representative agarose gels of PCR products.

# FIGURE S1

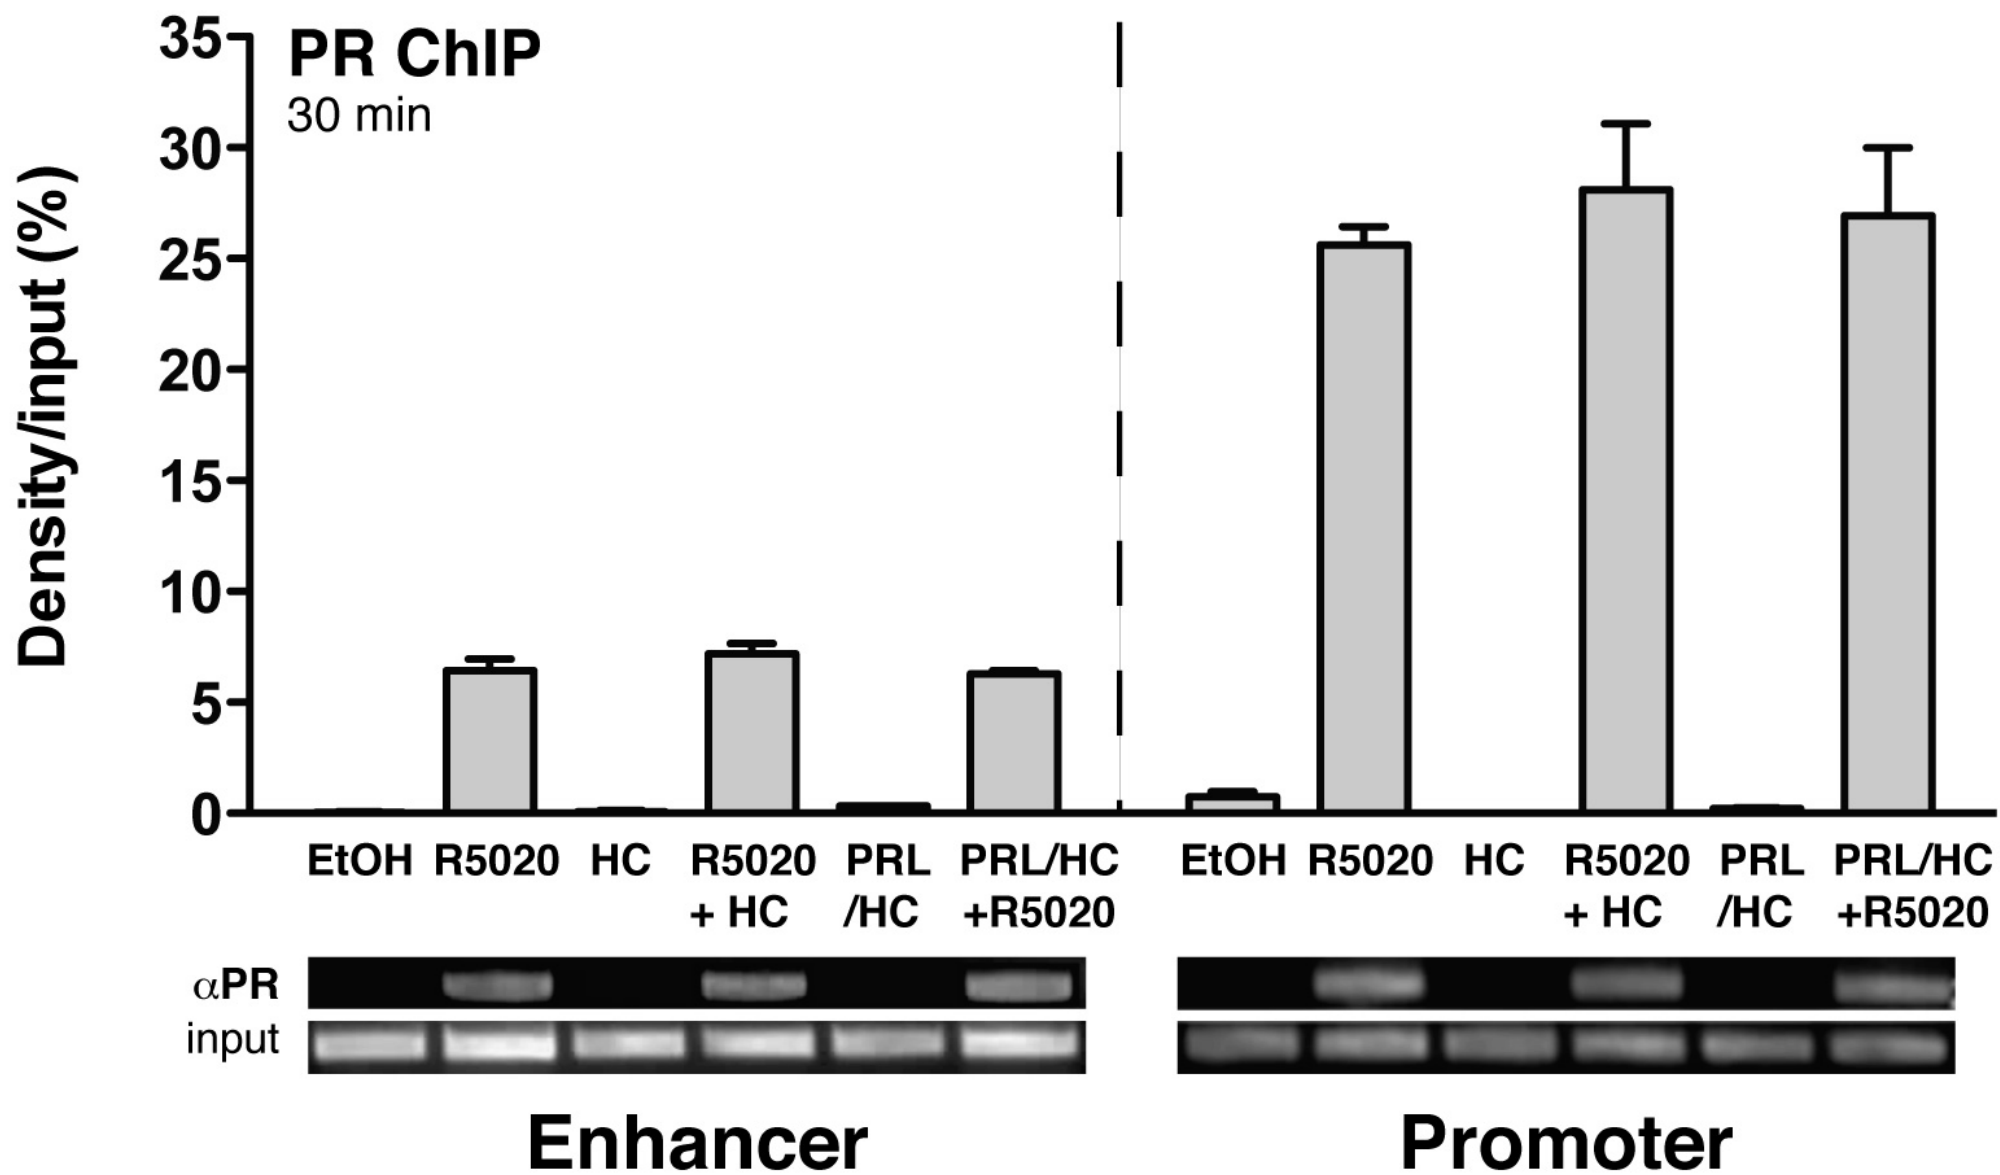

Supplement: supp_me.2011-0064_me-11-0064.pdf [file supp_me.2011-0064_me-11-0064.pdf]
